# Supplementary material for: Copy number variants from 4800 exomes contribute to ~7% of genetic diagnoses in movement disorders, muscle disorders and neuropathies
Source: PubMed Central journal article supplement (PMC10250492; doi:10.1038/s41431-023-01312-0), 2023-02-13
Supplement: 41431_2023_1312_MOESM3_ESM.pdf [file 41431_2023_1312_MOESM3_ESM.pdf]

## **Genes in Parkinson Panel**

*ATP1A3*

*C19orf12*

*CHCD2*

*CHMP2B*

*CSF1R*

*DCTN1*

*DNAJC6*

*FBXO7*

*FTL*

*GBA*

*GCH1*

*GRN*

*LRRK2*

*MAPT*

*MYORG*

*PARK7*

*PDGFB*

*PDGFRB*

*PINK1*

*PLA2G6*

*POLG*

*PRKN*

*PRKRA*

*PSEN1*

*SLC20A2*

*SLC30A10*

*SLC39A14*

*SLC6A3*

*SNCA*

*TAF1*

*TH*

*VPS13C*

*VPS35*

*WDR45*

*XPRR1*
