# Supplementary material for: Copy number variants from 4800 exomes contribute to ~7% of genetic diagnoses in movement disorders, muscle disorders and neuropathies
Source: PubMed Central journal article supplement (PMC10250492; doi:10.1038/s41431-023-01312-0), 2023-02-13
Supplement: 41431_2023_1312_MOESM4_ESM.pdf [file 41431_2023_1312_MOESM4_ESM.pdf]

| Individual number                                    | Sex | age onset / age at WES request | Reason                                                                                                                                    | Disease causing gene(s)              | Intrinsic / # of genes | Variant <sup>a</sup>                                                                                                                                                                                                                            | Copy number(s) | inheritance                               | Classification <sup>a</sup> | Likely diagnosis                  | OMIM disease                                                                                                                                                                                           | LOVD ID                     |
|------------------------------------------------------|-----|--------------------------------|-------------------------------------------------------------------------------------------------------------------------------------------|--------------------------------------|------------------------|-------------------------------------------------------------------------------------------------------------------------------------------------------------------------------------------------------------------------------------------------|----------------|-------------------------------------------|-----------------------------|-----------------------------------|--------------------------------------------------------------------------------------------------------------------------------------------------------------------------------------------------------|-----------------------------|
| Inheritance pattern of the involved variant/gene: AD |     |                                |                                                                                                                                           |                                      |                        |                                                                                                                                                                                                                                                 |                |                                           |                             |                                   |                                                                                                                                                                                                        |                             |
| AD1                                                  | M   | ? / 14                         | abnormal movement pattern                                                                                                                 | contiguous gene duplication syndrome | > 10                   | seq[GRCh37] 22q11.2q11.2(18893960_20307418)x3<br>NC_000022.10.g.(18775421_18893960)_(20307418_20383786)dup <sup>a</sup>                                                                                                                         | 3              | nd                                        | P                           | y                                 | Chromosome 22q11.2 duplication syndrome (#608363)                                                                                                                                                      | chr22_003028                |
| AD2                                                  | M   | 4 / 58                         | psychomotor delay, short stature, hypertelorism, ptosis, dystonia, extrapyramidal features                                                | contiguous gene deletion syndrome    | > 50                   | seq[GRCh37] 18p11.32p11.2(1168410_14764089)x1<br>NC_000018.9.g.(ppter_1168410)_(14764089_14772154)del                                                                                                                                           | 1              | nd                                        | P                           | y                                 | Chromosome 18p deletion syndrome (#146390)                                                                                                                                                             | chr18_02478                 |
| AD3                                                  | M   | ? / 7                          | spastic paraparesis, IQ57                                                                                                                 | contiguous gene deletion syndrome    | > 50                   | seq[GRCh37] 2q37q37(238482964_243037178)x1<br>NC_000002.11.g.(238475818_238482964)_(243037178_qter)del                                                                                                                                          | 1              | nd                                        | P                           | y                                 | 2q37 deletion syndrome (#600430)                                                                                                                                                                       | chr2_020446                 |
| AD4                                                  | M   | ? / 2                          | hemiplegia                                                                                                                                | contiguous gene deletion syndrome    | > 40                   | seq[GRCh37] 16p11.2p11.2(29468940_30199846)x1<br>NC_000016.9.g.(29376391_29468940)_(30199846_30208282)def <sup>a</sup>                                                                                                                          | 1              | maternal                                  | P                           | uncertain (incomplete penetrance) | Chromosome 16p11.2 deletion syndrome (78X6) [33]                                                                                                                                                       | chr16_006613                |
| AD5                                                  | M   | 0 / 11                         | hypotonia, facial muscle weakness, choreoathetotic syndrome                                                                               | contiguous gene duplication syndrome | > 50                   | seq[GRCh37] 15q11.2q11.2(20170101_32449994)x3<br>NC_000015.9.g.(ppter_20170101)_(32449994_32450569)dup                                                                                                                                          | 3              | nd                                        | P                           | y                                 | Chromosome 15q11-q13 duplication syndrome (#608636)                                                                                                                                                    | chr15_005981                |
| AD6                                                  | M   | 0 / 1                          | hypotonia, epilepsy                                                                                                                       | contiguous gene deletion syndrome    | ~ 20                   | seq[GRCh37] 15q11.2q11.2(23684730_28544722)x1<br>NC_000015.9.g.(23330473_23684730)_(28544722_28632805)del                                                                                                                                       | 1              | nd                                        | P                           | y                                 | Prader-Willi / Angelman syndrome (#176270 and #105830)                                                                                                                                                 | chr15_005982                |
| AD7                                                  | M   | ? / 37                         | ataxia, obesity, cognitive impairment                                                                                                     | contiguous gene deletion syndrome    | ~ 30                   | seq[GRCh37] 16p11.2p11.2(28403054_29376391)x1<br>NC_000016.9.g.(28332251_28403054)_(29376391_29468940)del                                                                                                                                       | 1              | nd                                        | P                           | uncertain (incomplete penetrance) | Chromosome 16p11.2 deletion syndrome (SH2B1) <sup>a</sup>                                                                                                                                              | chr16_006614                |
| AD8                                                  | F   | 45 / 59                        | multiple cerebral infarctions, walking problems, speech problems, memory problems, MRI shows leukoencephalopathy and small vessel disease | COL4A1, COL4A2                       | 2                      | seq[GRCh37] 13q34q34(110801458_111009963)x3<br>NC_000013.10.g.(110438412_110801458)_(111009963_111077120)dup                                                                                                                                    | 3              | nd                                        | LP                          | y                                 | Brain small vessel disease with or without ocular anomalies (#175780) and Brain small vessel disease 2 (#614483)                                                                                       | chr13_002359                |
| AD9                                                  | M   | ? / 4                          | seizures, dystonia                                                                                                                        | CACNB4, SCN1A, SCN2A                 | 4 / >50                | seq[GRCh37] 2q23.3q23.3(152520033_153192242)x3<br>NC_000002.11.g.(152518886_152520033)_(153192242_15378379)dup and seq[GRCh37] 2q24.2q31.1(164450154_173916537)x3<br>NC_000002.11.g.(163695052_164450154)_(173916537_174047565)dup <sup>a</sup> | 3              | de novo (paternity and maternity checked) | LP                          | y                                 | Episodic ataxia type 5 (#613855), Epileptic encephalopathy type 6 (#607208), Familial febrile seizures 3A (#604403), Epileptic encephalopathy 11 (#613721) and Familial infantile seizures 3 (#607745) | chr2_020447 and chr2_020456 |
| AD10                                                 | M   | ? / 39                         | episodic ataxia                                                                                                                           | CACNA1A                              | Intragenic             | seq[GRCh37] 19p13.2p13.2(13335371_13346648)x1<br>NC_000019.9.g.(13325430_13335371)_(13346648_13352244)delc<br>exon 33-39 (NM_023035.3) Out-of-frame                                                                                             | 1              | maternal                                  | LP                          | y                                 | Episodic ataxia type 2 (#108500)                                                                                                                                                                       | CACNA1A_000464              |
| AD11                                                 | M   | ? / 44                         | episodic ataxia                                                                                                                           | CACNA1A                              | Intragenic             | seq[GRCh37] 19p13.2p13.2(13445205_13445729)x1<br>NC_000019.9.g.(13441150_13445205)_(13445729_13470438)delc<br>exon 7-8 (NM_023035.3) Out-of-frame                                                                                               | 1              | nd                                        | P                           | y                                 | Episodic ataxia type 2 (#108500)                                                                                                                                                                       | chr19_007427                |
| AD12                                                 | M   | ? / 47                         | episodic ataxia                                                                                                                           | CACNA1A                              | Intragenic             | seq[GRCh37] 19p13.2p13.2(13470613_13476283)x1<br>NC_000019.9.g.(13470613_13476283)_(13476283_13482502)def <sup>a</sup><br>exon 5 (NM_023035.3) In-frame                                                                                         | 1              | maternal                                  | LP                          | y                                 | Episodic ataxia type 2 (#108500)                                                                                                                                                                       | chr19_007428                |
| AD13                                                 | M   | 50 / 63                        | spastic ataxia, dysarthria                                                                                                                | CACNA1G                              | 10                     | seq[GRCh37] 17q21.33q21.33(48469758_48697187)x3<br>NC_000017.10.g.(48465499_48469758)_(48697187_48699020)dup                                                                                                                                    | 3              | nd                                        | VOUS                        | uncertain                         | Spinocerebellar ataxia type 42 (#616795)                                                                                                                                                               | chr17_008700                |
| AD14                                                 | M   | ? / 18                         | partial DOPA-responsive dystonia                                                                                                          | GCH1                                 | Intragenic             | seq[GRCh37] 14q22.1q22.1(55369012_55369877)x1<br>NC_000014.8.g.(55344978_55369012)_(55369877_55408261)delc<br>exon 3 (NM_000161.3) Out-of-frame                                                                                                 | 1              | nd                                        | P                           | y                                 | DOPA-responsive dystonia (#128230)                                                                                                                                                                     | chr14_005090                |
| AD15                                                 | F   | ? / 67                         | dystonia and dysarthria                                                                                                                   | GNAL                                 | ~ 28                   | seq[GRCh37] 18p11.22p11.2(19708318_12884298)x1<br>NC_000018.9.g.(9595186_9708318)_(12884298_12948060)del                                                                                                                                        | 1              | nd                                        | P                           | y                                 | Dystonia 25 (#615073)                                                                                                                                                                                  | chr18_002479                |
| AD16                                                 | F   | <10 / 47                       | ataxia                                                                                                                                    | ITPR1                                | Intragenic             | seq[GRCh37] 3p26.1p26.1(4558177_4752241)x1<br>NC_000003.11.g.(4508999_4558177)_(4752241_4753421)del<br>exon 1-37 (NM_002222.6) In-frame                                                                                                         | 1              | nd                                        | P                           | y                                 | spinocerebellar ataxia type 15 (#06658) and type 29 (#117360)                                                                                                                                          | chr3_007292                 |
| AD17                                                 | M   | <10 / 22                       | fever-induced ataxia, cerebellar atrophy, myoclonus, chorea and dystonia                                                                  | NKX2-1                               | ~ 20                   | seq[GRCh37] 14q13.2q21.1(36064815_39594432)x1<br>NC_000014.8.g.(36044496_36064815)_(39594432_39769044)del                                                                                                                                       | 1              | nd                                        | P                           | y                                 | NKX2-1: Choreoathetosis, hypothyroidism and neonatal respiratory distress (#610978) and Hereditary benign chorea (#118700)                                                                             | chr14_005091                |
| AD18                                                 | F   | ? / 6                          | ataxia                                                                                                                                    | NKX2-1                               | 4                      | seq[GRCh37] 14q13.3q13.3(36982316_37344209)x1<br>NC_000014.8.g.(36960496_36982316)_(37344209_37641230)del                                                                                                                                       | 1              | nd                                        | P                           | y                                 | NKX2-1: Choreoathetosis, hypothyroidism and neonatal respiratory distress (#610978) and Hereditary benign chorea (#118700)                                                                             | chr14_005092                |
| AD19                                                 | M   | ? / 25                         | dystonia, myoclonus                                                                                                                       | SGCE                                 | Intragenic             | seq[GRCh37] 7q21.3q21.3(94228057_94230141)x1<br>NC_000007.13.g.(94218180_94228057)_(94230141_94248020)del<br>exon 7-9 (NM_003919.3) Out-of-frame                                                                                                | 1              | nd                                        | P                           | y                                 | myoclonic dystonia type 11 (#159900)                                                                                                                                                                   | chr7_006039                 |
| AD20                                                 | F   | ? / 6                          | myoclonic movements of the head and right arm                                                                                             | SGCE                                 | ~ 15                   | seq[GRCh37] 7q21.3q21.3(92730616_94953813)x1<br>NC_000007.13.g.(92462638_92730616)_(94953813_94989267)del                                                                                                                                       | 1              | nd                                        | P                           | y                                 | myoclonic dystonia type 11 (#159900)                                                                                                                                                                   | chr7_006040                 |
| AD21                                                 | F   | ? / 29                         | dystonia, myoclonus                                                                                                                       | SGCE                                 | 5                      | seq[GRCh37] 7q21.3q21.3(94024386_94540787)x1<br>NC_000007.13.g.(93633589_94024386)_(94540787_94740572)del                                                                                                                                       | 1              | nd                                        | P                           | y                                 | myoclonic dystonia type 11 (#159900)                                                                                                                                                                   | chr7_006042                 |
| AD22                                                 | F   | 35 / 41                        | spastic paraparesis                                                                                                                       | SPAST                                | 2                      | seq[GRCh37] 2p22.3p22.3(32286679_32449181)x1<br>NC_000002.11.g.(32264395_32286679)_(32449181_32449517)del                                                                                                                                       | 1              | nd                                        | P                           | y                                 | Spastic paraplegia type 4 (#182601)                                                                                                                                                                    | chr2_020448                 |
| AD23                                                 | F   | 20 / 51                        | spastic paraparesis                                                                                                                       | SPAST                                | 2                      | seq[GRCh37] 2p22.3p22.3(32286679_32449181)x1<br>NC_000002.11.g.(32289336_32312485)_(32400490_32402622)del                                                                                                                                       | 1              | nd                                        | P                           | y                                 | Spastic paraplegia type 4 (#182601)                                                                                                                                                                    | chr2_020449                 |

| Inheritance: AR |   |         |                                    |          |            |                                                                                                                                                                                                                                                                                                                                         |   |    |   |   |                                      |              |
|-----------------|---|---------|------------------------------------|----------|------------|-----------------------------------------------------------------------------------------------------------------------------------------------------------------------------------------------------------------------------------------------------------------------------------------------------------------------------------------|---|----|---|---|--------------------------------------|--------------|
| AR1             | M | 40 / 51 | polyneuropathy, pyramidal features | B4GALNT1 | 2          | seq[GRCh37] 12q13.3q13.3(58013640_58024073)x1<br>NC_000012.11.g.(58013640_58013640)_(58024073_58024237)del<br>exon 6-11 (NM_010178.5)<br>second variant: c.451G>A p.(Gly151Ser)<br>seq[GRCh37] 8p11.23p11.23(38107219_38112943)x0<br>NC_000008.10.g.(38105438_38107219)_(38112943_38117509)del<br>exon 11-16 (NM_015214.3) Out-of-frame | 1 | nd | P | y | Spastic paraplegia type 26 (#609195) | chr12_007428 |
| AR2             | M | ? / 15  | paraplegia, cognitive delay        | DDHD2    | Intragenic | seq[GRCh37] 8p11.23p11.23(38107219_38112943)x0<br>NC_000008.10.g.(38105438_38107219)_(38112943_38117509)del<br>exon 11-16 (NM_015214.3) Out-of-frame                                                                                                                                                                                    | 0 | nd | P | y | Spastic paraplegia type 54 (#615033) | chr8_005236  |



| AR24 | F | ? / 39 | Parkinson                                 | PRKN | Intragenic | NC_000006.9:g.(162206974_162394233)_162394462_162475040)dupc<br>second variant: c.1677>A p.(Val56Glu)<br>seq[GRCh37] 6q26q26(162394233_162394462)x4                                          | 4 | maternal & paternal | LP | y         | Juvenile Parkinson disease type 2 (#600116) | chr6_007451 | PARK2_000014 |  |
|------|---|--------|-------------------------------------------|------|------------|----------------------------------------------------------------------------------------------------------------------------------------------------------------------------------------------|---|---------------------|----|-----------|---------------------------------------------|-------------|--------------|--|
| AR25 | F | ? / 41 | Parkinson, cervical dystonia              | PRKN | Intragenic | NC_000006.11:g.(162475244_162622080)_162683770_162864377)def<br>exon 3-4 (NM_004562.3) in-frame<br>second variant: c.719C>T p.(Thr240Met)<br>seq[GRCh37] 6q26q26(162622080_162683770)x1      | 1 | nd                  | P  | y         | Juvenile Parkinson disease type 2 (#600116) | chr6_007452 |              |  |
|      |   |        |                                           |      |            |                                                                                                                                                                                              |   |                     |    |           |                                             |             | chr6_007456  |  |
| AR26 | M | ? / 42 | spasticity, cataract, dystonia, parkinson | PRKN | Intragenic | NC_000006.11:g.(162622319_162683461)_162683770_162864377)delc<br>exon 3 (NM_004562.3) Out-of-frame<br>second variant: c.101_102del p.(Gln34fs)<br>seq[GRCh37] 6q26q26(162683461_162683770)x1 | 1 | nd                  | P  | y         | Juvenile Parkinson disease type 2 (#600116) | chr6_007453 |              |  |
|      |   |        |                                           |      |            |                                                                                                                                                                                              |   |                     |    |           |                                             |             | PARK2_000007 |  |
| AR27 | M | ? / 63 | extrapyramidal features                   | PRKN | Intragenic | NC_000006.11:g.(162475244_162622080)_162622319_162683461)delc<br>exon 4 (NM_004562.3) Out-of-frame<br>no second variant<br>seq[GRCh37] 6q26q26(162622080_162622319)x1                        | 1 | paternal            | P  | uncertain | Juvenile Parkinson disease type 2 (#600116) | chr6_007454 |              |  |
|      |   |        |                                           |      |            |                                                                                                                                                                                              |   |                     |    |           |                                             |             |              |  |

Genome assembly GRCh37 (hg19)

c= confirmed by MLPA/array/sequencing/deletion PCR, see suppl. File 2

\*Based on ACMG guidelines. P=Pathogenic, LP=Likely Pathogenic, VOUS = Variant of Unknown Significance

<sup>a</sup> In some cases CNVs may extend into other sequences beyond the genes (i.e. intergenic or non-coding genes)

<sup>a</sup> Nomenclature according HGVS and/or ISCN (<http://varnomen.hgvs.org/recommendations/DNA/variant/complex/>). In case of intragenic CNVs, the predicted effect on the reading frame is indicated.
