# Supplementary material for: Copy number variants from 4800 exomes contribute to ~7% of genetic diagnoses in movement disorders, muscle disorders and neuropathies
Source: PubMed Central journal article supplement (PMC10250492; doi:10.1038/s41431-023-01312-0), 2023-02-13
Supplement: 41431_2023_1312_MOESM5_ESM.pdf [file 41431_2023_1312_MOESM5_ESM.pdf]

| Individual number                                           | Sex | age onset / age at WES request | Reason                                                                                    | Disease causing gene(s)              | Intragenic / # of genes | Variant <sup>a</sup>                                                                                                                                            | Copy number(s) | inheritance                               | Classification <sup>*</sup> | Likely diagnosis | OMIM disease                                                                       | LOVD ID      |
|-------------------------------------------------------------|-----|--------------------------------|-------------------------------------------------------------------------------------------|--------------------------------------|-------------------------|-----------------------------------------------------------------------------------------------------------------------------------------------------------------|----------------|-------------------------------------------|-----------------------------|------------------|------------------------------------------------------------------------------------|--------------|
| <b>Inheritance pattern of the involved variant/gene: AD</b> |     |                                |                                                                                           |                                      |                         |                                                                                                                                                                 |                |                                           |                             |                  |                                                                                    |              |
| BD1                                                         | M   | ? / 8                          | motor problems, reduced exercise tolerance, decreased muscle strength                     | contiguous gene duplication syndrome | > 50                    | seq[GRCh37] 22q11.21q11.21(18893961_21414845)x3<br>NC_000022.10.g.(18775422_18893961)_[21414845_21576183]dup                                                    | 3              | maternal                                  | P                           | y                | Chromosome 22q11.2 duplication syndrome (#608363)                                  | chr22_003030 |
| BD2                                                         | M   | 0 / 3                          | Delayed motor development, instability, weakness, drooling and protruding shoulder blade  | contiguous gene deletion syndrome    | > 50                    | seq[GRCh37] 22q11.21q11.21(18775072_21414845)x1<br>NC_000022.10.g.(18656690_18775072)_[21414845_21576183]del                                                    | 1              | de novo (paternity and maternity checked) | P                           | y                | Chromosome 22q11.2 deletion syndrome (#611867)                                     | chr22_003031 |
| BD3                                                         | M   | 0 / 13                         | exercise tolerance, congenital / axial myopathy, PDDNOS                                   | contiguous gene duplication syndrome | ~ 20                    | seq[GRCh37] 16p13.11p13.11(14916710_16315604)x3<br>NC_000016.9.g.(14772727_14916710)_[16315604_16349511]dup                                                     | 3              | nd                                        | P                           | y                | Chromosome 16p11.2 duplication syndrome (PMID30287593)                             | chr16_006618 |
| BD4                                                         | M   | 14 / 15                        | muscular dystrophy, limb-girdle and distal muscle weakness, finger and elbow contractures | SMCHD1                               | 7                       | seq[GRCh37] 18p11.31p11.31(2771468_3277978)x1<br>NC_000018.9.g.(2770192_2771468)_[3277978_3447718]del                                                           | 1              | nd                                        | LP                          | y                | Digenic Fascioscapulohumeral muscular dystrophy 2 (#158901)                        | chr18_002480 |
|                                                             |     |                                |                                                                                           |                                      |                         | <i>DUK4 status unknown</i>                                                                                                                                      |                |                                           |                             |                  |                                                                                    |              |
| BD5 <sup>b</sup>                                            | F   | 22 / 23                        | progressive exercise-related muscle pain and acidification, mild proximal hip weakness    | CAPN3 <sup>b</sup>                   | Intragenic              | seq[GRCh37] 15q15.1q15.1(42676657_42684925)x1<br>NC_000015.9.g.(42652323_42676657)_[42684925_42686351]del<br>exon 2-7 (NM_000070.2) In-frame                    | 1              | nd                                        | VOUS                        | uncertain        | Limb-girdle muscular dystrophy type 1 and 4 (#253600 and #618129)                  | chr15_005987 |
| BD6                                                         | F   | 2 / 35                         | congenital myopathy                                                                       | COL6A3                               | Intragenic              | seq[GRCh37] 2q37.3q37.3(238272947_238280992)x1<br>NC_000002.11.g.(23827210_238272947)_[238280992_238283014]del <sup>c</sup><br>exon 9-13 (NM_004369.4) In-frame | 1              | de novo (paternity and maternity checked) | P                           | y                | Bethlem myopathy 1 (#158810) and Ullrich congenital muscular dystrophy 1 (#254090) | chr2_020450  |
| BD7 <sup>b</sup>                                            | F   | ? / 20                         | exercise-related muscle pain and hyperCKemia, rhabdomyolysis                              | COL6A3 <sup>b</sup>                  | Intragenic              | seq[GRCh37] 2q37.3q37.3(238267054_238268923)x3<br>NC_000002.11.g.(238266574_238267054)_[238268923_238269676]dup<br>exon 17-21 (NM_004369.4) In-frame            | 3              | nd                                        | VOUS                        | uncertain        | Bethlem myopathy 1 (#158810) and Ullrich congenital muscular dystrophy 1 (#254090) | chr2_020451  |
| BD8                                                         | M   | ? / 13                         | proximal paresis, exercise intolerance, areflexion                                        | PMP22                                | 7                       | seq[GRCh37] 17p12p12(14095305)_[15477522]x3<br>NC_000017.10.g.(14005599_14095305)_[15477522_15492232]dup                                                        | 3              | nd                                        | P                           | y                | Charcot-Marie-Tooth disease 1A (#1118220)                                          | chr17_008701 |

|                        |   |         |                                                                                                                                                   |                                          |            |                                                                                                                                                                |   |                     |      |           |                                                                                                                                                 |              |
|------------------------|---|---------|---------------------------------------------------------------------------------------------------------------------------------------------------|------------------------------------------|------------|----------------------------------------------------------------------------------------------------------------------------------------------------------------|---|---------------------|------|-----------|-------------------------------------------------------------------------------------------------------------------------------------------------|--------------|
| <b>Inheritance: AR</b> |   |         |                                                                                                                                                   |                                          |            |                                                                                                                                                                |   |                     |      |           |                                                                                                                                                 |              |
| BR1                    | M | ? / 15  | ataxia, epilepsy, tubulopathy, exercise intolerance, complex I / II deficiency                                                                    | unknown, possibly SLC18A3, CHAT or OGDHL | ~ 40       | seq[GRCh37] 10q11.22q11.22(47409858_51633060)x1<br>NC_000010.10.g.(46967725_47409858)_[51633060_51644885]del                                                   | 1 | paternal            | P    | uncertain | Congenital myasthenic syndrome 21 (#617239)<br>Congenital myasthenic syndrome 6 (#254210),<br>Yoon-Bellen neurodevelopmental syndrome (#619701) | chr10_005520 |
|                        |   |         |                                                                                                                                                   |                                          |            | <i>no second variant in SLC18A3, CHAT, OGDHL</i>                                                                                                               |   |                     |      |           |                                                                                                                                                 |              |
| BR2                    | M | 31 / 33 | Muscle cramps and weakness. Mother has Pompe disease                                                                                              | GAA                                      | Intragenic | seq[GRCh37] 17q25.3q25.3(78091938_78092166)x1<br>NC_000017.10.g.(78091555_78091938)_[78092166_78092370]del<br>exon 18 (NM_000152.5) In-frame                   | 1 | nd                  | P    | uncertain | Glycogen storage disease II (#232300)                                                                                                           | chr17_008702 |
|                        |   |         |                                                                                                                                                   |                                          |            | <i>no second variant</i>                                                                                                                                       |   |                     |      |           |                                                                                                                                                 |              |
| BR3                    | M | ? / 38  | muscle atrophy, contractures, arthrogryposis multiplex congenita, muscular dystrophy, ocular muscle weakness                                      | LARGE1                                   | Intragenic | seq[GRCh37] 22q12.3q12.3(33670431_33733814)x3<br>NC_000022.10.g.(33562856_33670431)_[33733814_33777909]dup<br>exon 11-16 (NM_004737.6) In-frame                | 3 | nd                  | VOUS | uncertain | Muscular dystrophy-dystroglycanopathy type 6 (#608840 and #613154)                                                                              | chr22_003032 |
|                        |   |         |                                                                                                                                                   |                                          |            | <i>no second variant</i>                                                                                                                                       |   |                     |      |           |                                                                                                                                                 |              |
| BR4                    | M | ? / 10  | facial weakness, limb weakness distal-proximal                                                                                                    | NEB                                      | Intragenic | seq[GRCh37] 2q23.3q23.3(152466318_152582063)x1<br>NC_000002.11.g.(152432808_152466318)_[152582063_152584191]del<br>exon 6-81/105 (NM_004543.4) In-frame        | 1 | maternal            | P    | uncertain | Nemaline myopathy 2 (#256030)                                                                                                                   | chr2_020452  |
|                        |   |         |                                                                                                                                                   |                                          |            | <i>no second variant</i>                                                                                                                                       |   |                     |      |           |                                                                                                                                                 |              |
| BR5                    | F | 10 / 11 | developmental delay, muscle weakness limb-girdle pattern, muscle weakness distal, hyperCK emission                                                | SGCG                                     | Intragenic | seq[GRCh37] 13q12.12q12.12(23894775_23894899)x0<br>NC_000013.10.g.(23869626_23894775)_[23894899_23898506]del <sup>c</sup><br>exon 7 (NM_000231.3) Out-of-frame | 0 | maternal & paternal | P    | y         | Limb-girdle muscular dystrophy type 5 (#253700)                                                                                                 | chr13_002360 |
| BR6                    | M | ? / 42  | congenital myopathy                                                                                                                               | TTN                                      | Intragenic | seq[GRCh37] 2q31.2q31.2(179394967_179442912)x1<br>NC_000002.11.g.(179394843_179394967)_[179442912_179443337]del<br>exon 273-307 (NM_133378.4) In-frame         | 1 | nd                  | P    | uncertain | Limb-girdle muscular dystrophy (608807)                                                                                                         | chr2_020453  |
|                        |   |         |                                                                                                                                                   |                                          |            | <i>second variant: c.34625T&gt;C p.(Val11542Ala)</i>                                                                                                           |   |                     |      |           |                                                                                                                                                 |              |
| BR7                    | F | ? / 12  | muscle weakness limb-girdle pattern, exercise intolerance, joint pain, fatigue, muscle biopsy abnormalities, bilateral sensorineural hearing loss | TTN                                      | Intragenic | seq[GRCh37] 2q31.2q31.2(179556935_179601520)x3<br>NC_000002.11.g.(179556935)_[179601520]dup in tandem <sup>c</sup><br>exon 51-122 (NM_133378.4) In-frame       | 3 | maternal            | LP   | y         | Limb-girdle muscular dystrophy (608807)                                                                                                         | chr2_020454  |
|                        |   |         |                                                                                                                                                   |                                          |            | <i>second variant: c.12064C&gt;T p.(Arg4022*)</i>                                                                                                              |   |                     |      |           |                                                                                                                                                 |              |
|                        |   |         |                                                                                                                                                   |                                          |            | <i>paternal</i>                                                                                                                                                |   |                     |      |           |                                                                                                                                                 |              |
|                        |   |         |                                                                                                                                                   |                                          |            | <i>P</i>                                                                                                                                                       |   |                     |      |           |                                                                                                                                                 |              |
|                        |   |         |                                                                                                                                                   |                                          |            | <i>TTN_005127</i>                                                                                                                                              |   |                     |      |           |                                                                                                                                                 |              |

|                        |   |        |                                                                                         |      |            |                                                                                                                                                   |   |    |   |   |                                                             |             |
|------------------------|---|--------|-----------------------------------------------------------------------------------------|------|------------|---------------------------------------------------------------------------------------------------------------------------------------------------|---|----|---|---|-------------------------------------------------------------|-------------|
| <b>Inheritance: XL</b> |   |        |                                                                                         |      |            |                                                                                                                                                   |   |    |   |   |                                                             |             |
| BX1                    | F | ? / 57 | muscle weakness facio-bulbar and limb-girdle pattern                                    | MTM1 | 3          | seq[GRCh37] Xq28q28(149760968_149988006)x1<br>NC_000023.10.g.(149681299_149760968)_[149988006_150154184]del                                       | 1 | nd | P | y | X-linked myotubular myopathy (#310400)                      | chrX_018706 |
| BX2                    | F | ? / 25 | exercise intolerance, myalgia, hyperCK emission, high ferritin, myopathic muscle biopsy | DMD  | Intragenic | seq[GRCh37] Xp21.1p21.1(32429868_32717410)x1<br>NC_000023.10.g.(32408298_32429868)_[32717410_32827609]del<br>exon 8-30 (NM_004006.2) Out-of-frame | 1 | nd | P | y | Duchenne or Becker muscular dystrophy (#310200 and #300376) | chrX_018707 |

|     |   |         |                                                                                                                                      |     |            |                                                                                                                                                                                                                                                                                                   |   |                             |    |   |                                                             |                             |
|-----|---|---------|--------------------------------------------------------------------------------------------------------------------------------------|-----|------------|---------------------------------------------------------------------------------------------------------------------------------------------------------------------------------------------------------------------------------------------------------------------------------------------------|---|-----------------------------|----|---|-------------------------------------------------------------|-----------------------------|
| BX3 | M | ? / 14  | muscle cramps, myalgia, hyperCK-emia                                                                                                 | DMD | Intragenic | seq[GRCh37] Xp21.1p21.1(32456358_32662430)x0<br>NC_000023.10g(32430030_32456358)_[32662430_32663081]del <sup>f</sup><br>exon 11-29 (NM_004006.2) In-frame                                                                                                                                         | 0 | de novo (maternity checked) | P  | y | Duchenne or Becker muscular dystrophy (#310200 and #300376) | chrX_018708                 |
| BX4 | M | ? / 50  | muscle weakness limb-girdle pattern                                                                                                  | DMD | Intragenic | seq[GRCh37] Xp21.1p21.1(31893307_31986631)x0<br>NC_000023.10g(31854939_31893307)_[31986631_32235032]del <sup>f</sup><br>exon 45-48 (NM_004006.2) In-frame                                                                                                                                         | 0 | nd                          | P  | y | Duchenne or Becker muscular dystrophy (#310200 and #300376) | chrX_018709                 |
| BX5 | F | ? / 12  | hip dysplasia, late milestones, ptosis, rapid choking, agenesis (> 10 elements), contractures of elbows and finger joints            | DMD | Intragenic | seq[GRCh37] Xp21.1p21.1(30851433_31286044)x3<br>NC_000023.10g(30851433)_[31286044]dup <sup>f</sup><br>exon 63-79 (NM_004006.2) Out-of-frame<br>and<br>seq[GRCh37] Xp21.1p21.1(31675215_32174025)x3<br>NC_000023.10g(31675215)_[32174025]dup <sup>f</sup><br>exon 45-54 (NM_004006.2) Out-of-frame | 3 | nd                          | LP | y | Duchenne or Becker muscular dystrophy (#310200 and #300376) | chrX_018710 and chrX_018714 |
| BX6 | F | 40 / 48 | myopathy, muscular dystrophy, muscle weakness limb-girdle pattern                                                                    | DMD | Intragenic | seq[GRCh37] Xp21.1p21.1(31496270_31950345)x1<br>NC_000023.10g(31462793_31496270)_[31950345_31986484]del <sup>f</sup><br>exon 46-59 (NM_004006.2) Out-of-frame                                                                                                                                     | 1 | nd                          | P  | y | Duchenne or Becker muscular dystrophy (#310200 and #300376) | chrX_018711                 |
| BX7 | M | ? / 22  | muscular dystrophy, limb-girdle muscle weakness, caridal symptoms, respiratory symptoms, suspicion Duchenne, intellectual disability | DMD | Intragenic | seq[GRCh37] Xp21.1p21.1(31838091_31986631)x0<br>NC_000023.10g(31792309_31838091)_[31986631_32235032]del <sup>f</sup><br>exon 45-50 (NM_004006.2) Out-of-frame                                                                                                                                     | 0 | nd                          | P  | y | Duchenne or Becker muscular dystrophy (#310200 and #300376) | chrX_018712                 |
| BX8 | M | ? / 4   | Duchenne muscular dystrophy, hyperCK-emia                                                                                            | DMD | Intragenic | seq[GRCh37] Xp21.1p21.1(31187487_31646026)x0<br>NC_000023.10g(31165638_31187487)_[31646026_31676121]del <sup>f</sup><br>exon 55-74 (NM_004006.2) In-frame                                                                                                                                         | 0 | nd                          | P  | y | Duchenne or Becker muscular dystrophy (#310200 and #300376) | chrX_018713                 |

Genome assembly GRCh37 (hg19)

c= confirmed by MLPA/array/sequencing/deletion PCR, see suppl. File 2

\*Based on ACMG guidelines. P=Pathogenic, LP=Likely Pathogenic, VQUS = Variant of Unknown Significance

<sup>a</sup> in some cases CNV's may extend into other sequences beyond the genes (i.e. intergenic or non-coding genes)

<sup>b</sup> these individuals may also have a recessive disorders since the genes are involved in both dominant and recessive disorders. No family history; no segregation has been performed.

<sup>^</sup> Nomenclature according HGVS and/or ISCN (<http://varnomen.hgvs.org/recommendations/DNA/variant/complex/>). In case of intragenic CNVs, the predicted effect on the reading frame is indicated.
