# Supplementary material for: Copy number variants from 4800 exomes contribute to ~7% of genetic diagnoses in movement disorders, muscle disorders and neuropathies
Source: PubMed Central journal article supplement (PMC10250492; doi:10.1038/s41431-023-01312-0), 2023-02-13
Supplement: 41431_2023_1312_MOESM6_ESM.pdf [file 41431_2023_1312_MOESM6_ESM.pdf]

| Individual number                                    | Sex | age onset / age at WES request | Reason                                                          | Disease causing gene(s) | Intragenic # of genes | Variant*                                                                                                                                         | Copy number(s) | Inheritance | Classification* | Likely diagnosis | OMIM disease                                          | LOVD ID      |
|------------------------------------------------------|-----|--------------------------------|-----------------------------------------------------------------|-------------------------|-----------------------|--------------------------------------------------------------------------------------------------------------------------------------------------|----------------|-------------|-----------------|------------------|-------------------------------------------------------|--------------|
| Inheritance pattern of the involved variant/gene: AD |     |                                |                                                                 |                         |                       |                                                                                                                                                  |                |             |                 |                  |                                                       |              |
| CD1                                                  | F   | 7 / 44                         | neuropathy                                                      | DCTN1                   | >20                   | seq[GRCh37] 2p13.2p13.2(4300675_74909185)x3<br>NC_000002.11:g(174273449_74300675)_74909185_75059781:dup                                          | 3              | nd          | VOUS            | uncertain        | Distal hereditary motor neuropathy type VIII [662764] | chr2_020455  |
| CD2                                                  | M   | 7 / 72                         | neuropathy                                                      | PMP22                   | 7                     | seq[GRCh37] 17p11.2p11.2(14095305_15477522)x1<br>NC_000017.10:g(14005599_14095305)_15477522_15492323:del                                         | 1              | nd          | P               | Y                | Neuropathy, recurrent, with pressure palsies [162500] | chr18_008703 |
| CD3                                                  | F   | 7 / 44                         | HMSN / HNPP                                                     | PMP22                   | 7                     | seq[GRCh37] 17p11.2p11.2(14095305_15477522)x1<br>NC_000017.10:g(14005599_14095305)_15477522_15492323:del                                         | 1              | nd          | P               | Y                | Neuropathy, recurrent, with pressure palsies [162500] | chr18_008703 |
| CD4                                                  | F   | 410 / 64                       | diffuse paresis distal-proximal, pes cavus                      | PMP22                   | 7                     | seq[GRCh37] 17p11.2p11.2(14095305_15477522)x3<br>NC_000017.10:g(14005599_14095305)_15477522_15492323:dup                                         | 3              | nd          | P               | Y                | Charcot-Marie-Tooth disease 1A [111822]               | chr17_008701 |
| CD5                                                  | F   | 7 / 60                         | neuropathy                                                      | PMP22                   | 7                     | seq[GRCh37] 17p11.2p11.2(14095305_15477522)x3<br>NC_000017.10:g(14005599_14095305)_15477522_15492323:dup                                         | 3              | nd          | P               | Y                | Charcot-Marie-Tooth disease 1A [111822]               | chr17_008701 |
| CD6                                                  | F   | 7 / 61                         | Charcot-Marie-Tooth                                             | PMP22                   | 7                     | seq[GRCh37] 17p11.2p11.2(14095305_15477522)x3<br>NC_000017.10:g(14005599_14095305)_15477522_15492323:dup                                         | 3              | nd          | P               | Y                | Charcot-Marie-Tooth disease 1A [111822]               | chr17_008701 |
| CD7                                                  | F   | 7 / 27                         | HMSN type I                                                     | PMP22                   | 7                     | seq[GRCh37] 17p11.2p11.2(14095305_15477522)x3<br>NC_000017.10:g(14005599_14095305)_15477522_15492323:dup                                         | 3              | nd          | P               | Y                | Charcot-Marie-Tooth disease 1A [111822]               | chr17_008701 |
| CD8                                                  | M   | 7 / 68                         | HMSN type I                                                     | PMP22                   | 7                     | seq[GRCh37] 17p11.2p11.2(14095305_15477522)x3<br>NC_000017.10:g(14005599_14095305)_15477522_15492323:dup                                         | 3              | nd          | P               | Y                | Charcot-Marie-Tooth disease 1A [111822]               | chr17_008701 |
| CD9                                                  | M   | 30 / 49                        | neuropathy, muscle atrophy, distal muscle weakness, hollow feet | PMP22                   | 7                     | seq[GRCh37] 17p11.2p11.2(14095305_15477522)x3<br>NC_000017.10:g(14005599_14095305)_15477522_15492323:dup                                         | 3              | nd          | P               | Y                | Charcot-Marie-Tooth disease 1A [111822]               | chr17_008701 |
| CD10                                                 | F   | 26 / 60                        | HMSN type II                                                    | PMP22                   | 7                     | seq[GRCh37] 17p11.2p11.2(14095305_15477522)x3<br>NC_000017.10:g(14005599_14095305)_15477522_15492323:dup                                         | 3              | nd          | P               | Y                | Charcot-Marie-Tooth disease 1A [111822]               | chr17_008701 |
| CD11                                                 | F   | 7 / 50                         | polyneuropathy                                                  | PMP22                   | 7                     | seq[GRCh37] 17p11.2p11.2(14095305_15477522)x3<br>NC_000017.10:g(14005599_14095305)_15477522_15492323:dup                                         | 3              | nd          | P               | Y                | Charcot-Marie-Tooth disease 1A [111822]               | chr17_008701 |
| CD12                                                 | M   | 7 / 5                          | HMSN type 1A, hypotonia, ptosis, ceroid lipofuscinosis          | PMP22                   | 7                     | seq[GRCh37] 17p11.2p11.2(14095305_15477522)x3<br>NC_000017.10:g(14005599_14095305)_15477522_15492323:dup                                         | 3              | nd          | P               | Y                | Charcot-Marie-Tooth disease 1A [111822]               | chr17_008701 |
| CD13                                                 | M   | 7 / 44                         | HMSN type I                                                     | PMP22                   | 7                     | seq[GRCh37] 17p11.2p11.2(14095305_15477522)x3<br>NC_000017.10:g(14005599_14095305)_15477522_15492323:dup                                         | 3              | nd          | P               | Y                | Charcot-Marie-Tooth disease 1A [111822]               | chr17_008701 |
| CD14                                                 | M   | 7 / 64                         | neuropathy                                                      | PMP22                   | 7                     | seq[GRCh37] 17p11.2p11.2(14095305_15477522)x3<br>NC_000017.10:g(14005599_14095305)_15477522_15492323:dup                                         | 3              | nd          | P               | Y                | Charcot-Marie-Tooth disease 1A [111822]               | chr17_008701 |
| Inheritance: AR                                      |     |                                |                                                                 |                         |                       |                                                                                                                                                  |                |             |                 |                  |                                                       |              |
| CR1                                                  | M   | 7 / 7                          | neuropathy, motor developmental delay                           | FARS2                   | 2                     | seq[GRCh37] 6p25.1p25.1(5218764_5545601)x1<br>NC_000006.11:g(1144510_5218764)_5545601_5613304:del<br>exon 1-5 (NM_006567.5)<br>no second variant | 1              | nd          | LP              | uncertain        | autosomal recessive spastic paraplegia 77 [6617046]   | chr6_007456  |

Genome assembly GRCh37 (hg19)

c= confirmed by MLPA/array/sequencing/deletion PCR, see suppl. File 2

\*Based on ACMG guidelines. P=Pathogenic, LP=Likely Pathogenic, VOUS = Variant of Unknown Significance

† In some cases CNVs may extend into other sequences beyond the genes (i.e. intergenic or non-coding genes)

\*Nomenclature according HGVS and/or ICN (<http://varnomen.hgvs.org/recommendations/DNA/variant/complex/>). In case of intragenic CNVs, the predicted effect on the reading frame is indicated.
